# Supplementary material for: Enhanced photocatalytic activity for the degradation of rhodamine B by integrating salinity gradient power into a photocatalytic fuel cell
Source: Royal Society of Chemistry journal article supplement (doi:10.1039/c5ra20093h), 2015-01-01
Supplement: c5ra20093h1.pdf [file c5ra20093h1.pdf]

Supporting Information for

**Enhanced photocatalytic activity for the degradation of rhodamine B  
by integrating salinity gradient power into a photocatalytic fuel cell**

Mingrui Sui,<sup>‡a,b</sup> Yue Dong<sup>‡a,b</sup> and Hong You<sup>\*a,b</sup>

<sup>a</sup>State Key Laboratory of Urban Water Resource and Environment, Harbin Institute of Technology. No 73 Huanghe Road, Nangang District, Harbin 150090, China

<sup>b</sup>School of Municipal and Environmental Engineering, Harbin Institute of Technology. No 73 Huanghe Road, Nangang District, Harbin 150090, China

\*Corresponding author. E-mail: youhonghit@sina.com; Phone: (+86)451-86283118;  
Fax: (+86)451-86283118

<sup>‡</sup> Both authors contributed equally.

Table S1. Basic parameters of the xenon lamp used in this study

| Mode                                   | GY-10A, Tuopu Co. Ltd., China |
|----------------------------------------|-------------------------------|
| Bulb power (W)                         | 150                           |
| Starting voltage (V)                   | >10000                        |
| Working voltage (V)                    | 18-20                         |
| Working current (A)                    | 6-8                           |
| Wave length range (nm)                 | 190-2800                      |
| Parallel beam diameter (mm)            | 30-60                         |
| Luminous Flux (lm)                     | 3100                          |
| Light irradiance (mW/cm <sup>2</sup> ) | 100                           |
| Inherent light ripple                  | <3%                           |

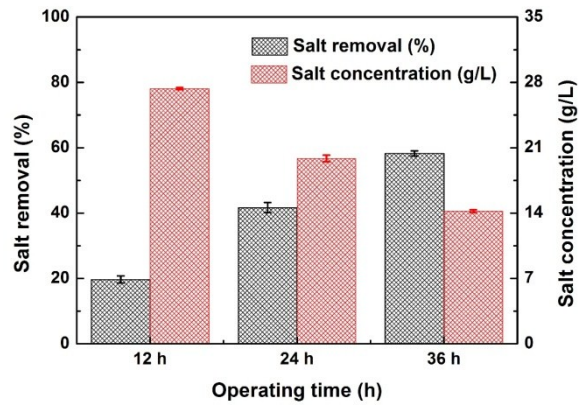

Fig. S1 Desalination performance of the PFC system at HRTs 12 h, 24 h and 36 h for the middle chamber

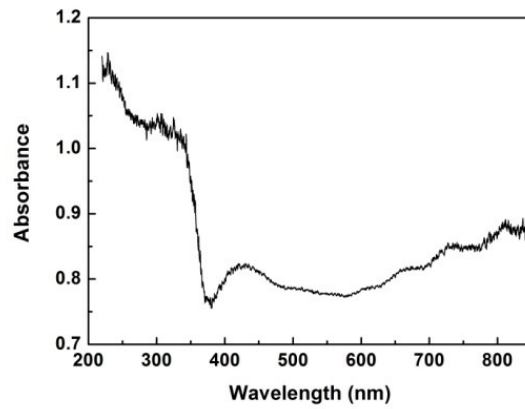

Fig. S2 UV-visible spectra of TiO<sub>2</sub> photoanode.

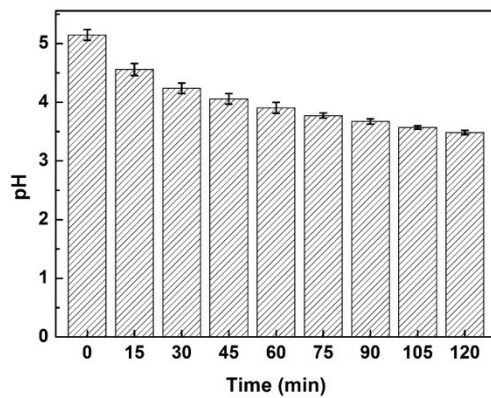

Fig. S3 Change of pH of anode solution during PFC operation.
